# Supplementary material for: An Internet-Based Diabetes Management Platform Improves Team Care and Outcomes in an Urban Latino Population
Source: Oxford University Press journal article supplement (doi:10.2337/dc14-1412), 2015-01-29
Supplement: dc141412supplementarydata.pdf [file dc141412supplementarydata.pdf]

SUPPLEMENTARY DATA

Supplementary Figure 1. “Snapshot” summary page of the Diabetes Dashboard diabetes management tool used in the intervention condition; CDMP refers to “Comprehensive Diabetes Management Program”

**CDMP - Baystate** Search | User Pref | Admin | Help | Log Out

My Care Team | My HM Data | Status Center | Add Patient | Repository | JVN | Studies | Reports | Encounter

---

**Patient Menu**

- Patient info
- Snapshot
- ☐ Alerts/Reminders
- ☐ Clinical
- ☐ Education
- Surveys
- JVN Report
- Nutrition
- Care Plan
- ☐ Add/Edit Patient Data
- Encounters
- Documents
- Reports

open all | close all

---

**Patient Snapshot:** Name and Date of Birth **Team:** Research Print

---

**Demographics**

Gender: FEMALE    Age:    Ethnicity: Hispanic    Race: White    Status: Initial Visit    Taking Aspirin: Y    Depression: Y    Alcohol:   

Conditions:    Allergies: Penicillin    Notes: Form ID# 48661 (R2)

---

|                                                                                                                                                                                                                                                                                                                                                                                                                                                                                       |                                                                                                                                                                                                                                                                                                                                                                                                                                                                                                                                                                                                                                                                                                                                                                                                                                                                                                                     |                                                                                                       |
|---------------------------------------------------------------------------------------------------------------------------------------------------------------------------------------------------------------------------------------------------------------------------------------------------------------------------------------------------------------------------------------------------------------------------------------------------------------------------------------|---------------------------------------------------------------------------------------------------------------------------------------------------------------------------------------------------------------------------------------------------------------------------------------------------------------------------------------------------------------------------------------------------------------------------------------------------------------------------------------------------------------------------------------------------------------------------------------------------------------------------------------------------------------------------------------------------------------------------------------------------------------------------------------------------------------------------------------------------------------------------------------------------------------------|-------------------------------------------------------------------------------------------------------|
| <p><b>Patient Status Data</b></p> <p>Red Alerts: 9 Open (0 New), 0 in last 90 days<br/>                 Yellow Alerts: 1 Open (0 New), 0 in last 90 days<br/>                 Reminders: 0 Past Due, 0 Due Today<br/>                 Care Plan: <span style="color: red;">Closed Care Plan - End Date: 01/19/2012</span><br/>                 Procedures: 0 in last 365 days<br/>                 Admissions: 0 in last 365 days<br/>                 Last Encounter: 01/19/2012</p> | <p><b>Risk Profile (View)</b></p> <p>Glycemic Control <span style="color: red;">●</span> High<br/>                 Cardiovascular <span style="color: green;">●</span> Low<br/>                 Foot Disease <span style="color: yellow;">●</span> Medium<br/>                 Retinopathy <span style="color: red;">●</span> High<br/>                 Nephropathy <span style="color: yellow;">●</span> Medium</p> <p><b>DSCP Scores (01/19/2012)</b></p> <p>( Summary   Detail )<br/>                 PAID Score: 88 <span style="color: red;">High Distress</span><br/>                 Family Distress Score: 12 of 21 (06/29/2011)<br/>                 Diabetes Topic: Plan de alimentos<br/>                 Goals: Algún límite</p> <p><b>Care Plan Readiness to Change</b></p> <p>Hypoglycemia                      Not specified<br/>                 Hyperglycemia                    Not specified</p> | <p><b>Quick Notes (Add Note   View History)</b></p> <p>No Quick Notes found in the last 6 months.</p> |
|---------------------------------------------------------------------------------------------------------------------------------------------------------------------------------------------------------------------------------------------------------------------------------------------------------------------------------------------------------------------------------------------------------------------------------------------------------------------------------------|---------------------------------------------------------------------------------------------------------------------------------------------------------------------------------------------------------------------------------------------------------------------------------------------------------------------------------------------------------------------------------------------------------------------------------------------------------------------------------------------------------------------------------------------------------------------------------------------------------------------------------------------------------------------------------------------------------------------------------------------------------------------------------------------------------------------------------------------------------------------------------------------------------------------|-------------------------------------------------------------------------------------------------------|

---

| <p><b>Labs and Vital Signs</b></p> <table border="1" style="width: 100%; border-collapse: collapse;"> <thead> <tr> <th>Labs</th> <th>Date</th> <th>Value/Trend</th> </tr> </thead> <tbody> <tr> <td>A1C</td> <td>01/19/2012</td> <td>6.6 % -</td> </tr> <tr> <td>LDL</td> <td>07/08/2011</td> <td>94 mg/dl</td> </tr> <tr> <td>Serum Creatinine</td> <td colspan="2">No Results Found</td> </tr> <tr> <td>Fasting Glucose</td> <td colspan="2">No Results Found</td> </tr> <tr> <td>Random Glucose</td> <td colspan="2">No Results Found</td> </tr> <tr> <td>A/C ratio</td> <td colspan="2">No Results Found</td> </tr> <tr> <td>Triglycerides</td> <td>07/08/2011</td> <td>125 mg/dl</td> </tr> <tr> <td colspan="3"><b>Vitals</b></td> </tr> <tr> <td>Systolic BP</td> <td>01/19/2012</td> <td>135 +</td> </tr> <tr> <td>Diastolic BP</td> <td>01/19/2012</td> <td>78 +</td> </tr> <tr> <td>Height</td> <td>01/19/2012</td> <td>62 =</td> </tr> <tr> <td>Weight</td> <td>01/19/2012</td> <td>167.2 +</td> </tr> <tr> <td>BMI</td> <td>01/19/2012</td> <td>30.58 +</td> </tr> </tbody> </table> | Labs               | Date                 | Value/Trend | A1C | 01/19/2012 | 6.6 % - | LDL | 07/08/2011 | 94 mg/dl | Serum Creatinine | No Results Found |  | Fasting Glucose | No Results Found |  | Random Glucose | No Results Found |  | A/C ratio | No Results Found |  | Triglycerides | 07/08/2011 | 125 mg/dl | <b>Vitals</b> |  |  | Systolic BP | 01/19/2012 | 135 + | Diastolic BP | 01/19/2012 | 78 + | Height | 01/19/2012 | 62 = | Weight | 01/19/2012 | 167.2 + | BMI | 01/19/2012 | 30.58 + | <p><b>Current Medications</b></p> <table border="1" style="width: 100%; border-collapse: collapse;"> <thead> <tr> <th>Medication Name</th> <th>Dosage</th> <th>Frequency</th> </tr> </thead> <tbody> <tr> <td>aspirin</td> <td>81 mg</td> <td>1 Time per Day</td> </tr> <tr> <td>insulin glargine</td> <td>100 units/mL</td> <td>Every Day at Bedtime</td> </tr> <tr> <td colspan="3">20units q HS</td> </tr> <tr> <td>levothyroxine</td> <td>125 mcg (0.125 mg)</td> <td>1 Time per Day</td> </tr> <tr> <td>lisinopril</td> <td>10 mg</td> <td>1 Time per Day</td> </tr> <tr> <td>metformin</td> <td>500 mg</td> <td>2 Times per Day</td> </tr> </tbody> </table> | Medication Name | Dosage | Frequency | aspirin | 81 mg | 1 Time per Day | insulin glargine | 100 units/mL | Every Day at Bedtime | 20units q HS |  |  | levothyroxine | 125 mcg (0.125 mg) | 1 Time per Day | lisinopril | 10 mg | 1 Time per Day | metformin | 500 mg | 2 Times per Day | <p><b>Chronic Problems</b></p> <p>716.29 - ALLERGIC ARTHRITIS MULT SITES<br/>                 250.92 - DIABETES COMPL UNSP TYPE II UNCN<br/>                 244.9 - UNS HYPOTHYROIDISM</p> |
|--------------------------------------------------------------------------------------------------------------------------------------------------------------------------------------------------------------------------------------------------------------------------------------------------------------------------------------------------------------------------------------------------------------------------------------------------------------------------------------------------------------------------------------------------------------------------------------------------------------------------------------------------------------------------------------------------------------------------------------------------------------------------------------------------------------------------------------------------------------------------------------------------------------------------------------------------------------------------------------------------------------------------------------------------------------------------------------------------|--------------------|----------------------|-------------|-----|------------|---------|-----|------------|----------|------------------|------------------|--|-----------------|------------------|--|----------------|------------------|--|-----------|------------------|--|---------------|------------|-----------|---------------|--|--|-------------|------------|-------|--------------|------------|------|--------|------------|------|--------|------------|---------|-----|------------|---------|--------------------------------------------------------------------------------------------------------------------------------------------------------------------------------------------------------------------------------------------------------------------------------------------------------------------------------------------------------------------------------------------------------------------------------------------------------------------------------------------------------------------------------------------------------------------------------------------------------------------------------------------------------------------|-----------------|--------|-----------|---------|-------|----------------|------------------|--------------|----------------------|--------------|--|--|---------------|--------------------|----------------|------------|-------|----------------|-----------|--------|-----------------|---------------------------------------------------------------------------------------------------------------------------------------------------------------------------------------------|
| Labs                                                                                                                                                                                                                                                                                                                                                                                                                                                                                                                                                                                                                                                                                                                                                                                                                                                                                                                                                                                                                                                                                             | Date               | Value/Trend          |             |     |            |         |     |            |          |                  |                  |  |                 |                  |  |                |                  |  |           |                  |  |               |            |           |               |  |  |             |            |       |              |            |      |        |            |      |        |            |         |     |            |         |                                                                                                                                                                                                                                                                                                                                                                                                                                                                                                                                                                                                                                                                    |                 |        |           |         |       |                |                  |              |                      |              |  |  |               |                    |                |            |       |                |           |        |                 |                                                                                                                                                                                             |
| A1C                                                                                                                                                                                                                                                                                                                                                                                                                                                                                                                                                                                                                                                                                                                                                                                                                                                                                                                                                                                                                                                                                              | 01/19/2012         | 6.6 % -              |             |     |            |         |     |            |          |                  |                  |  |                 |                  |  |                |                  |  |           |                  |  |               |            |           |               |  |  |             |            |       |              |            |      |        |            |      |        |            |         |     |            |         |                                                                                                                                                                                                                                                                                                                                                                                                                                                                                                                                                                                                                                                                    |                 |        |           |         |       |                |                  |              |                      |              |  |  |               |                    |                |            |       |                |           |        |                 |                                                                                                                                                                                             |
| LDL                                                                                                                                                                                                                                                                                                                                                                                                                                                                                                                                                                                                                                                                                                                                                                                                                                                                                                                                                                                                                                                                                              | 07/08/2011         | 94 mg/dl             |             |     |            |         |     |            |          |                  |                  |  |                 |                  |  |                |                  |  |           |                  |  |               |            |           |               |  |  |             |            |       |              |            |      |        |            |      |        |            |         |     |            |         |                                                                                                                                                                                                                                                                                                                                                                                                                                                                                                                                                                                                                                                                    |                 |        |           |         |       |                |                  |              |                      |              |  |  |               |                    |                |            |       |                |           |        |                 |                                                                                                                                                                                             |
| Serum Creatinine                                                                                                                                                                                                                                                                                                                                                                                                                                                                                                                                                                                                                                                                                                                                                                                                                                                                                                                                                                                                                                                                                 | No Results Found   |                      |             |     |            |         |     |            |          |                  |                  |  |                 |                  |  |                |                  |  |           |                  |  |               |            |           |               |  |  |             |            |       |              |            |      |        |            |      |        |            |         |     |            |         |                                                                                                                                                                                                                                                                                                                                                                                                                                                                                                                                                                                                                                                                    |                 |        |           |         |       |                |                  |              |                      |              |  |  |               |                    |                |            |       |                |           |        |                 |                                                                                                                                                                                             |
| Fasting Glucose                                                                                                                                                                                                                                                                                                                                                                                                                                                                                                                                                                                                                                                                                                                                                                                                                                                                                                                                                                                                                                                                                  | No Results Found   |                      |             |     |            |         |     |            |          |                  |                  |  |                 |                  |  |                |                  |  |           |                  |  |               |            |           |               |  |  |             |            |       |              |            |      |        |            |      |        |            |         |     |            |         |                                                                                                                                                                                                                                                                                                                                                                                                                                                                                                                                                                                                                                                                    |                 |        |           |         |       |                |                  |              |                      |              |  |  |               |                    |                |            |       |                |           |        |                 |                                                                                                                                                                                             |
| Random Glucose                                                                                                                                                                                                                                                                                                                                                                                                                                                                                                                                                                                                                                                                                                                                                                                                                                                                                                                                                                                                                                                                                   | No Results Found   |                      |             |     |            |         |     |            |          |                  |                  |  |                 |                  |  |                |                  |  |           |                  |  |               |            |           |               |  |  |             |            |       |              |            |      |        |            |      |        |            |         |     |            |         |                                                                                                                                                                                                                                                                                                                                                                                                                                                                                                                                                                                                                                                                    |                 |        |           |         |       |                |                  |              |                      |              |  |  |               |                    |                |            |       |                |           |        |                 |                                                                                                                                                                                             |
| A/C ratio                                                                                                                                                                                                                                                                                                                                                                                                                                                                                                                                                                                                                                                                                                                                                                                                                                                                                                                                                                                                                                                                                        | No Results Found   |                      |             |     |            |         |     |            |          |                  |                  |  |                 |                  |  |                |                  |  |           |                  |  |               |            |           |               |  |  |             |            |       |              |            |      |        |            |      |        |            |         |     |            |         |                                                                                                                                                                                                                                                                                                                                                                                                                                                                                                                                                                                                                                                                    |                 |        |           |         |       |                |                  |              |                      |              |  |  |               |                    |                |            |       |                |           |        |                 |                                                                                                                                                                                             |
| Triglycerides                                                                                                                                                                                                                                                                                                                                                                                                                                                                                                                                                                                                                                                                                                                                                                                                                                                                                                                                                                                                                                                                                    | 07/08/2011         | 125 mg/dl            |             |     |            |         |     |            |          |                  |                  |  |                 |                  |  |                |                  |  |           |                  |  |               |            |           |               |  |  |             |            |       |              |            |      |        |            |      |        |            |         |     |            |         |                                                                                                                                                                                                                                                                                                                                                                                                                                                                                                                                                                                                                                                                    |                 |        |           |         |       |                |                  |              |                      |              |  |  |               |                    |                |            |       |                |           |        |                 |                                                                                                                                                                                             |
| <b>Vitals</b>                                                                                                                                                                                                                                                                                                                                                                                                                                                                                                                                                                                                                                                                                                                                                                                                                                                                                                                                                                                                                                                                                    |                    |                      |             |     |            |         |     |            |          |                  |                  |  |                 |                  |  |                |                  |  |           |                  |  |               |            |           |               |  |  |             |            |       |              |            |      |        |            |      |        |            |         |     |            |         |                                                                                                                                                                                                                                                                                                                                                                                                                                                                                                                                                                                                                                                                    |                 |        |           |         |       |                |                  |              |                      |              |  |  |               |                    |                |            |       |                |           |        |                 |                                                                                                                                                                                             |
| Systolic BP                                                                                                                                                                                                                                                                                                                                                                                                                                                                                                                                                                                                                                                                                                                                                                                                                                                                                                                                                                                                                                                                                      | 01/19/2012         | 135 +                |             |     |            |         |     |            |          |                  |                  |  |                 |                  |  |                |                  |  |           |                  |  |               |            |           |               |  |  |             |            |       |              |            |      |        |            |      |        |            |         |     |            |         |                                                                                                                                                                                                                                                                                                                                                                                                                                                                                                                                                                                                                                                                    |                 |        |           |         |       |                |                  |              |                      |              |  |  |               |                    |                |            |       |                |           |        |                 |                                                                                                                                                                                             |
| Diastolic BP                                                                                                                                                                                                                                                                                                                                                                                                                                                                                                                                                                                                                                                                                                                                                                                                                                                                                                                                                                                                                                                                                     | 01/19/2012         | 78 +                 |             |     |            |         |     |            |          |                  |                  |  |                 |                  |  |                |                  |  |           |                  |  |               |            |           |               |  |  |             |            |       |              |            |      |        |            |      |        |            |         |     |            |         |                                                                                                                                                                                                                                                                                                                                                                                                                                                                                                                                                                                                                                                                    |                 |        |           |         |       |                |                  |              |                      |              |  |  |               |                    |                |            |       |                |           |        |                 |                                                                                                                                                                                             |
| Height                                                                                                                                                                                                                                                                                                                                                                                                                                                                                                                                                                                                                                                                                                                                                                                                                                                                                                                                                                                                                                                                                           | 01/19/2012         | 62 =                 |             |     |            |         |     |            |          |                  |                  |  |                 |                  |  |                |                  |  |           |                  |  |               |            |           |               |  |  |             |            |       |              |            |      |        |            |      |        |            |         |     |            |         |                                                                                                                                                                                                                                                                                                                                                                                                                                                                                                                                                                                                                                                                    |                 |        |           |         |       |                |                  |              |                      |              |  |  |               |                    |                |            |       |                |           |        |                 |                                                                                                                                                                                             |
| Weight                                                                                                                                                                                                                                                                                                                                                                                                                                                                                                                                                                                                                                                                                                                                                                                                                                                                                                                                                                                                                                                                                           | 01/19/2012         | 167.2 +              |             |     |            |         |     |            |          |                  |                  |  |                 |                  |  |                |                  |  |           |                  |  |               |            |           |               |  |  |             |            |       |              |            |      |        |            |      |        |            |         |     |            |         |                                                                                                                                                                                                                                                                                                                                                                                                                                                                                                                                                                                                                                                                    |                 |        |           |         |       |                |                  |              |                      |              |  |  |               |                    |                |            |       |                |           |        |                 |                                                                                                                                                                                             |
| BMI                                                                                                                                                                                                                                                                                                                                                                                                                                                                                                                                                                                                                                                                                                                                                                                                                                                                                                                                                                                                                                                                                              | 01/19/2012         | 30.58 +              |             |     |            |         |     |            |          |                  |                  |  |                 |                  |  |                |                  |  |           |                  |  |               |            |           |               |  |  |             |            |       |              |            |      |        |            |      |        |            |         |     |            |         |                                                                                                                                                                                                                                                                                                                                                                                                                                                                                                                                                                                                                                                                    |                 |        |           |         |       |                |                  |              |                      |              |  |  |               |                    |                |            |       |                |           |        |                 |                                                                                                                                                                                             |
| Medication Name                                                                                                                                                                                                                                                                                                                                                                                                                                                                                                                                                                                                                                                                                                                                                                                                                                                                                                                                                                                                                                                                                  | Dosage             | Frequency            |             |     |            |         |     |            |          |                  |                  |  |                 |                  |  |                |                  |  |           |                  |  |               |            |           |               |  |  |             |            |       |              |            |      |        |            |      |        |            |         |     |            |         |                                                                                                                                                                                                                                                                                                                                                                                                                                                                                                                                                                                                                                                                    |                 |        |           |         |       |                |                  |              |                      |              |  |  |               |                    |                |            |       |                |           |        |                 |                                                                                                                                                                                             |
| aspirin                                                                                                                                                                                                                                                                                                                                                                                                                                                                                                                                                                                                                                                                                                                                                                                                                                                                                                                                                                                                                                                                                          | 81 mg              | 1 Time per Day       |             |     |            |         |     |            |          |                  |                  |  |                 |                  |  |                |                  |  |           |                  |  |               |            |           |               |  |  |             |            |       |              |            |      |        |            |      |        |            |         |     |            |         |                                                                                                                                                                                                                                                                                                                                                                                                                                                                                                                                                                                                                                                                    |                 |        |           |         |       |                |                  |              |                      |              |  |  |               |                    |                |            |       |                |           |        |                 |                                                                                                                                                                                             |
| insulin glargine                                                                                                                                                                                                                                                                                                                                                                                                                                                                                                                                                                                                                                                                                                                                                                                                                                                                                                                                                                                                                                                                                 | 100 units/mL       | Every Day at Bedtime |             |     |            |         |     |            |          |                  |                  |  |                 |                  |  |                |                  |  |           |                  |  |               |            |           |               |  |  |             |            |       |              |            |      |        |            |      |        |            |         |     |            |         |                                                                                                                                                                                                                                                                                                                                                                                                                                                                                                                                                                                                                                                                    |                 |        |           |         |       |                |                  |              |                      |              |  |  |               |                    |                |            |       |                |           |        |                 |                                                                                                                                                                                             |
| 20units q HS                                                                                                                                                                                                                                                                                                                                                                                                                                                                                                                                                                                                                                                                                                                                                                                                                                                                                                                                                                                                                                                                                     |                    |                      |             |     |            |         |     |            |          |                  |                  |  |                 |                  |  |                |                  |  |           |                  |  |               |            |           |               |  |  |             |            |       |              |            |      |        |            |      |        |            |         |     |            |         |                                                                                                                                                                                                                                                                                                                                                                                                                                                                                                                                                                                                                                                                    |                 |        |           |         |       |                |                  |              |                      |              |  |  |               |                    |                |            |       |                |           |        |                 |                                                                                                                                                                                             |
| levothyroxine                                                                                                                                                                                                                                                                                                                                                                                                                                                                                                                                                                                                                                                                                                                                                                                                                                                                                                                                                                                                                                                                                    | 125 mcg (0.125 mg) | 1 Time per Day       |             |     |            |         |     |            |          |                  |                  |  |                 |                  |  |                |                  |  |           |                  |  |               |            |           |               |  |  |             |            |       |              |            |      |        |            |      |        |            |         |     |            |         |                                                                                                                                                                                                                                                                                                                                                                                                                                                                                                                                                                                                                                                                    |                 |        |           |         |       |                |                  |              |                      |              |  |  |               |                    |                |            |       |                |           |        |                 |                                                                                                                                                                                             |
| lisinopril                                                                                                                                                                                                                                                                                                                                                                                                                                                                                                                                                                                                                                                                                                                                                                                                                                                                                                                                                                                                                                                                                       | 10 mg              | 1 Time per Day       |             |     |            |         |     |            |          |                  |                  |  |                 |                  |  |                |                  |  |           |                  |  |               |            |           |               |  |  |             |            |       |              |            |      |        |            |      |        |            |         |     |            |         |                                                                                                                                                                                                                                                                                                                                                                                                                                                                                                                                                                                                                                                                    |                 |        |           |         |       |                |                  |              |                      |              |  |  |               |                    |                |            |       |                |           |        |                 |                                                                                                                                                                                             |
| metformin                                                                                                                                                                                                                                                                                                                                                                                                                                                                                                                                                                                                                                                                                                                                                                                                                                                                                                                                                                                                                                                                                        | 500 mg             | 2 Times per Day      |             |     |            |         |     |            |          |                  |                  |  |                 |                  |  |                |                  |  |           |                  |  |               |            |           |               |  |  |             |            |       |              |            |      |        |            |      |        |            |         |     |            |         |                                                                                                                                                                                                                                                                                                                                                                                                                                                                                                                                                                                                                                                                    |                 |        |           |         |       |                |                  |              |                      |              |  |  |               |                    |                |            |       |                |           |        |                 |                                                                                                                                                                                             |

**Supplementary Figure 2. Clinical Decision Support summary report generated for intervention providers; CDMP refers to “Comprehensive Diabetes Management Program”**

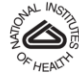

**Baystate Medical Center**

**CDMP Provider Summary**

Diabetes Care Management  
 Last Visit: 07/12/2012  
 Next Visit: 10/26/2012

MRN: [REDACTED]  
 Date Of Birth: [REDACTED]  
 Primary Care Provider: [REDACTED]  
 Type of Diabetes: 2

Weight: 197.0 lbs. BMI: 36.03  
 Family Distress: 8  
 On Aspirin: Yes  
 Smoker: No

**Diabetes**  
 Metformin 1000 mg 2 Times per Day  
 GlipiZIDE 10 mg 2 Times per Day

**Hypercholesterolemia**  
 Simvastatin 40 mg 1 Time per Day

**Hypertension**  
 Lisinopril 20 mg 1 Time per Day

GFR:  
 HDL: 64 mg/dL 10/27/2011  
 LDL: 40 g/dL 4/14/2012  
 Triyglycerides: 225 mg/dL 10/27/2011

ALT: 10 units 10/27/2011  
 Creatinine: 1.0 mg/dL 10/27/2011  
 Micro/CR Ratio: 25 mg/g 10/27/2011

Foot Exam: 06/03/2011  
 Eye Exam: 01/12/2012  
 Dental Exam: 04/01/2010  
 Last Flu Shot: 10/27/2011  
 PneumoVax Shot: 10/27/2011

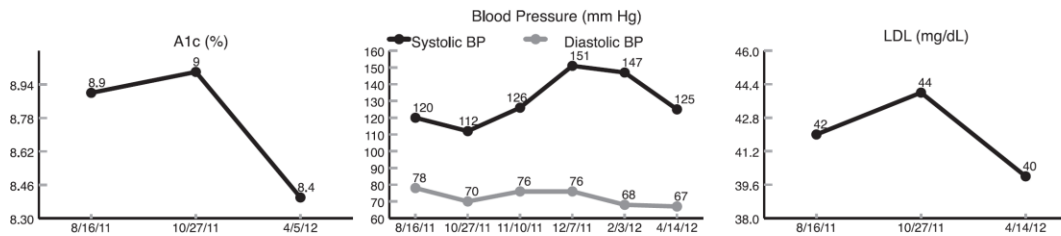

**Assessments**

Hyperglycemia - : Fasting elevated > 190 mg/dL Hypoglycemia -: denies s/s

**Barriers**

Knowledge Deficit;

**Education Provided**

Medications (taking correctly) - Verbalizes Understanding;

**Goals**

Agrees to SMBG Tid and to bring to all appt - Last Evaluated; -Progress: Initiate Goal

**Notes to PCP**

Patient was seen for diabetes education as per scheduled appt. She is on Metformin 1000 mg bid, GlipiZIDE 10 mg bid. 30 days BG average is 216 g/dl. Patient c/o general body pain. She reports eating less but her BG are elevated in AM. She does not SMBG after meal. She was advised to SMBG 3 times a day: FBG, before dinner and 2 hours after dinner. Plan: SMBG as described above, bring meter to all appt for BG review. Continue counting grams of carbs and do not exceed 45 grams per meal. Continue with oral agents as prescribed/ F/up

Reccommendations to PCP: consider Lantus 10 units q HS, message given to Lucy Dr. [REDACTED] nurse.

Encounter Notes Date: 08/17/2012 Care Provider Name: Santiago-Kelly, Paula Care Provider Phone: [REDACTED]

Information in this report is protected under HIPPA Regulations.
